# Supplementary material
Source: PubMed Central journal article supplement (PMC2592635)

### **E08-03-0235 Martin**

**Supplemental Fig. 1.** Knock down of Syt-7 does not affect evoked dense-core vesicle exocytosis in PC12 cells. Exocytic events were monitored as changes in ANF-EGFP fluorescence in 10s intervals and plotted cumulatively in wild-type cells and cells transfected with a Syt-7-directed shRNA plasmid. Western blotting and densitometry indicated that the Syt-7 shRNA plasmid reduced Syt-7 levels by at least 60%. CAPS-1 is shown as a loading control.

**Supplemental Fig. 2.** Syt-1<sup>4A</sup> and Syt-1<sup>4W</sup> are re-expressed and appropriately targeted to dense-core vesicles in Syt-1/9-null PC12 cells. **(A)** Western blotting was used to compare Syt-1 levels in wild-type cells and Syt-1/9-null cells versus null cells re-expressing Syt-1<sup>4W</sup> or Syt-1<sup>4A</sup>. 10 µg of cell lysate was analyzed per lane with immunoblotted SNAP-25 as a loading control. **(B)** Immunocytochemistry with Syt-1 antibody was used to localize Syt-1<sup>4W</sup> and Syt-1<sup>4A</sup> re-expressed in Syt-null PC12 cells. The re-expressed proteins exhibited a punctate distribution resembling that of chromogranin B (CgB), a dense-core vesicle protein. The Syt-1 antibody exhibited a degree of non-specific staining evident in the Syt-null cells that did not co-localize with CgB.

**Supplemental Fig. 3.** **(A)** ANF-EGFP is expressed and targeted to dense-core vesicles similarly in wild-type or Syt-1 mutant-expressing cells. Distribution shows the vesicle ANF-EGFP fluorescence (background subtracted) for 150 vesicles determined by TIRF microscopy in wild-type, Syt-1<sup>RK</sup>-expressing or Syt-1<sup>4W</sup>-expressing cells. Mean ( $\pm$  SE) fluorescence values were  $3093 \pm 182$  for wild-type,  $2699 \pm 168$  for Syt-1<sup>RK</sup>, and  $3025 \pm 173$  for Syt-1<sup>4W</sup>, which were not significantly different. **(B)** BDNF-EGFP is expressed and targeted to dense-core vesicles similarly in wild-type or Syt-1 mutant-expressing cells. Distribution shows the vesicle BDNF-EGFP fluorescence (background subtracted) for 100 vesicles determined by TIRF microscopy in wild-type, Syt-1<sup>RK</sup>-expressing or Syt-1<sup>4W</sup>-expressing cells. Mean ( $\pm$  SE) fluorescence values were  $2063 \pm 163$  for wild-type,  $2106 \pm 176$  for Syt-1<sup>RK</sup>, and  $2417 \pm 178$  for Syt-1<sup>4W</sup>, which were not significantly different. **(C)** Syt-1 mutants do not affect the number of plasma membrane-proximal vesicles. Dense-core vesicles containing ANF-EGFP were counted in cell footprints by TIRF microscopy and

normalized to calculated footprint area (mean  $\pm$  SE). Wild-type cells (n=20) did not differ significantly from Syt-1/9-null cells that expressed Syt-1<sup>RK</sup> (n=18), Syt-1<sup>RK/KK</sup> (n=15), Syt-1<sup>4A</sup> (n=10) or Syt-1<sup>4W</sup> (n=10) mutants.

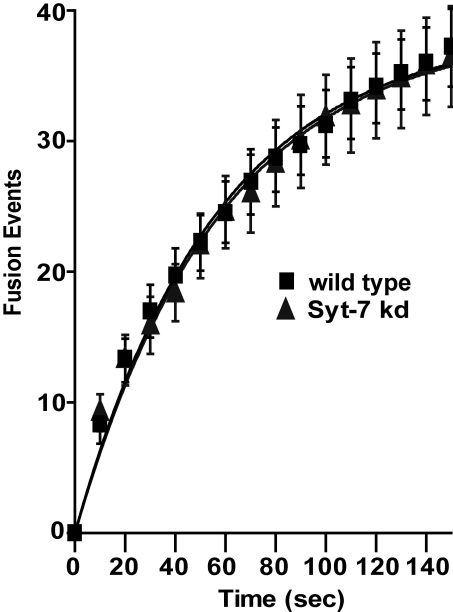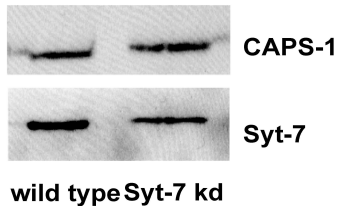

**A**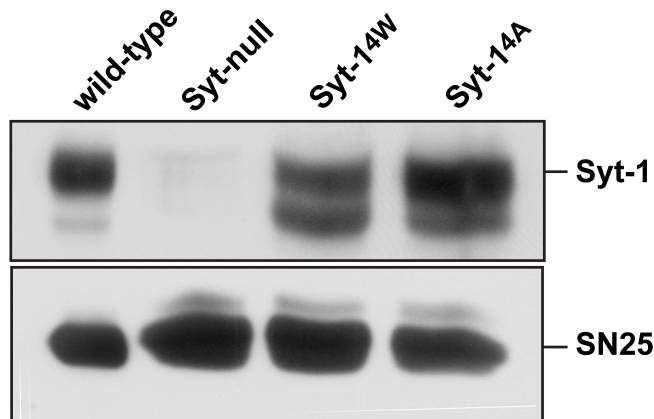**B**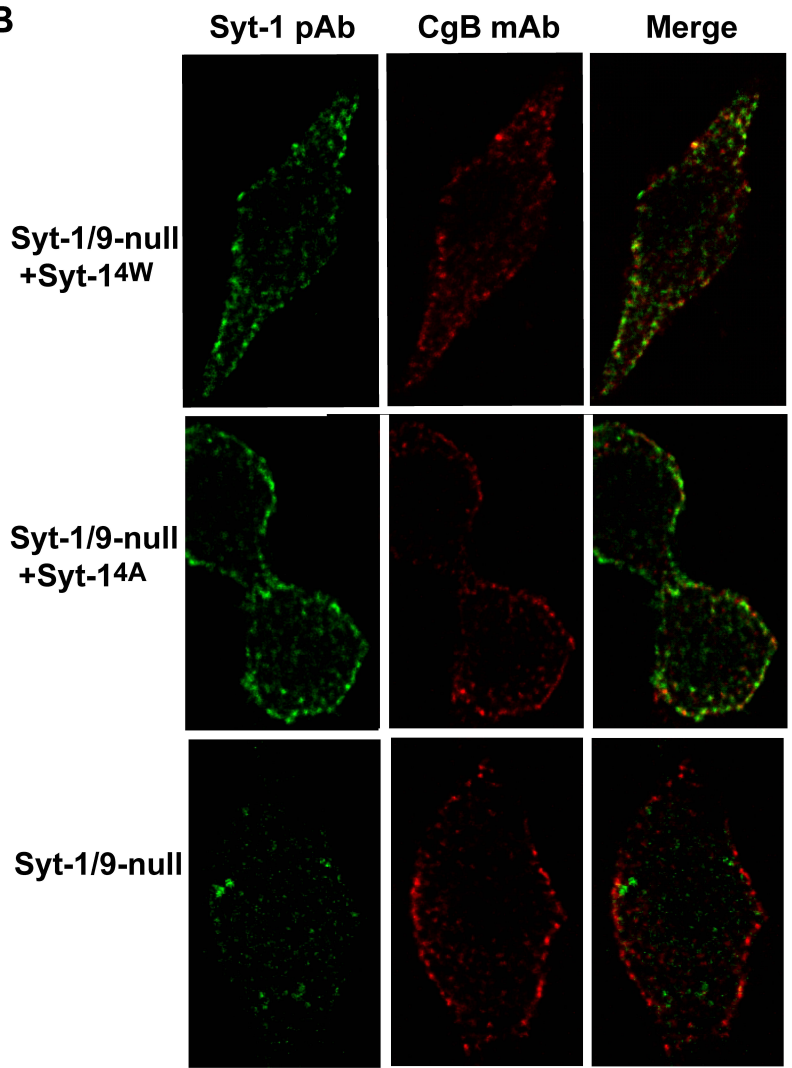

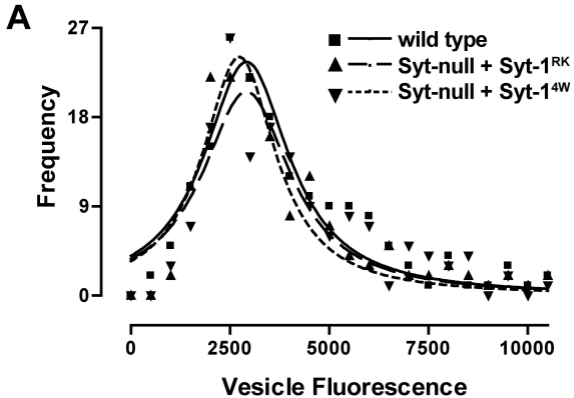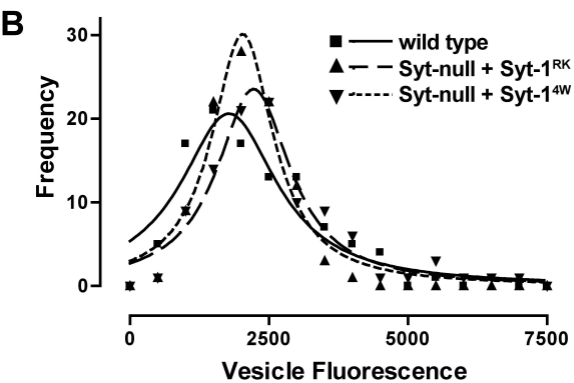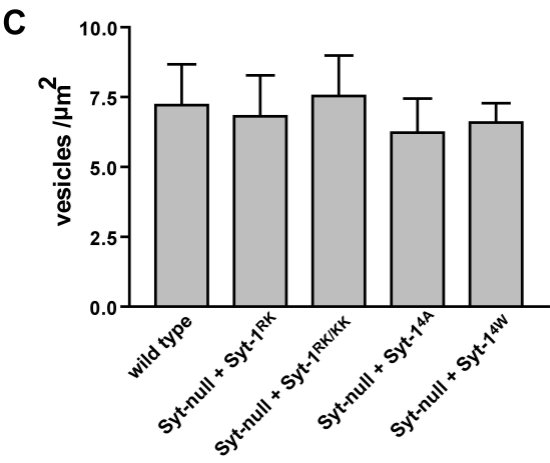

Supplement: E08-03-0235_1.pdf [file E08-03-0235_1.pdf]
